# Supplementary material
Source: publisher figshare collection journal article supplement (https://frontiersin.figshare.com/ndownloader/files/24867257)
Supplement: Supplementary file [file 24867257]

|            |     |                                                               |
|------------|-----|---------------------------------------------------------------|
| SARS-CoV-2 | 1   | MSDNGPQ-NQRMAPRITFGGPDSTGSDNQNGERSGARSKQRRPQGLPNNTASWFTALTQH  |
| SARS-CoV   | 1   | MSDNGPQSNQRSAPRITFGGPDSTDMNQNGGRNGARPKQRRPQGLPNNTASWFTALTQH   |
| SARS-CoV-2 | 60  | GKEELRFPRGQGVPIINTNSSPDDQIGYYRRATRRIRGGDGKMKELSPRWYFYLLGTGPEA |
| SARS-CoV   | 61  | GKEELRFPRGQGVPIINTNSCPDDQIGYYRRATRRIRGGDGKMKELSPRWYFYLLGTGPEA |
| SARS-CoV-2 | 120 | GLPYGANKDGIWVATEGALNTPKDHIGTRNPANNAATVLQLPQGTTLPKGFYAEGRGG    |
| SARS-CoV   | 121 | SLPYGANKEGIWVATEGALNTPKDHIGTRNPANNAATVLQLPQGTTLPKGFYAEGRGG    |
| SARS-CoV-2 | 180 | SQASSRSSSRSRNSSRNSTPGSSRGTSPTARMAGNGGLAALALLLLDRLNQLESKMSGKGQ |
| SARS-CoV   | 181 | SQASSRSSSRSRGNSRNSTPGSSRGNSPTARMASGGGTALALLLLDRLNQLESKMSGKGQ  |
| SARS-CoV-2 | 240 | QQQGQTVTKKSAAEASKKPRQKRTATKAYNVVTQAFGRRGPEQTQGNFGDQELIRQGTDYK |
| SARS-CoV   | 241 | QQQGQTVTKKSAAEASKKPRQKRTATKQYNVTQAFGRRGPEQTQGNFGDQELIRQGTDYK  |
| SARS-CoV-2 | 300 | HWPQIAQFAPSASAFFGMSRIGMEVTPSGTWLTYTGAIKLDDKDPNFKDQVILLNKHIDA  |
| SARS-CoV   | 301 | HWPQIAQFAPSASAFFGMSRIGMEVTPSGTWLTYHGAIKLDDKDPNFKDQVILLNKHIDA  |
| SARS-CoV-2 | 360 | YKTFPPTEPKKDKKKKADETOALPQRQKKQPTVTLLPAADLDDFSKQLQCSMS--SADST  |
| SARS-CoV   | 361 | YKTFPPTEPKKDKKKKTDEAQLPQRQKKQPTVTLLPAADMDDFSQQLQNSMSGASADST   |
| SARS-CoV-2 | 418 | QA                                                            |
| SARS-CoV   | 421 | QA                                                            |

Total sites= 422 aa

Conserved sites= 382 aa

Variable sites= 37 aa

Deleted sites= 3 aa

**Supplemental Figure 1: Protein Alignment of N-Protein from SARS-CoV and SARS-CoV-2.**  
Alignment was performed using MEGA-X and aligned using ClustalW with the default settings.  
Conserved sites are highlighted in black; substitutions of biochemically similar amino acids are highlighted in grey. Alignment is with accession's SARS-CoV: NP\_828858.1 and SARS-CoV-2: YP\_009724397.2

|            |      |                                                                 |
|------------|------|-----------------------------------------------------------------|
| SARS-CoV   | 1    | APITKGVTFGDDTVWEVQGYKNNRITFELDERMDKVLNEKCSVYTVESGTEVTEFACVVAE   |
| SARS-CoV-2 | 1    | APTK-VTFGDDTVIEVQGYKSVNITFELDERMDKVLNEKCSAYTVELGTEVNEFACVVAD    |
| SARS-CoV   | 61   | AVVKTLPVSDLLTNMGIDLDEWSVATFYLFDDAGEENFSSRMYSFYPPDEEEEDAFEC      |
| SARS-CoV-2 | 60   | AVVKTLPVSELLTPIGIDLDEWSVATFYLFDESSEGFKLASHMYCSFYPPDEEEEDGDC     |
| SARS-CoV   | 121  | EEEEIDEICEHEYGTEDDYQGLPLEFGASAETVRVEEEEEEDWLDDTTEQSE-----       |
| SARS-CoV-2 | 119  | EEEEFEPSTQYEGTEDDYQGKPLEFGASAAQPEEEEQEEDWLDDDSQQIVGQQDGSED      |
| SARS-CoV   | 173  | -----IEPEPEPTPEEP-----VNOFTGYLKLTDNVAIKCVDIVKEAQSANPMV          |
| SARS-CoV-2 | 179  | NQTTTIQTIVEVQPLEMELTPVVQTIENVNSESGLYKLTDNVYIKNADIVEEAKKVKPTV    |
| SARS-CoV   | 217  | IVNAANTHLKHGGGVAGALNKATNGAMQKESDDYIKLNGPLTVGGSCVLSGHNLAKECLH    |
| SARS-CoV-2 | 239  | VVNAANVYLKHGGGVAGALNKATNNAMQVESDDYIATNGPLKVGGSCVLSGHNLAKECLH    |
| SARS-CoV   | 277  | VVGPNINAGEDIQLLKAAYENFNFSQDILLAPLLSAGIFGAKPIQSLQVCVQTVRTOVYLA   |
| SARS-CoV-2 | 299  | VVGPNVNGEDIQLLKSAYENFNQHEVLLAPLLSAGIFGADPIHSLRVCVDTVRTRNVYLA    |
| SARS-CoV   | 337  | VNDKALYEQVMDYLLNLKPEVEAPKQEEPPNTEDS--KTEKSVVQKPVDPKPIKACI       |
| SARS-CoV-2 | 359  | VFDKNLYDKIVSSLEMKSEKQVEQKIAETPKKEEVKPEETESKPSVEQRKQDDKKIKACV    |
| SARS-CoV   | 395  | DEVTTTLEETKFLTNKLLLEADINGKLYHDSQNMIRGEDMSFLEKDAPYVVGDTVITSGDI   |
| SARS-CoV-2 | 419  | BEVTTTLEETKFLTENLLLEIDINGNLHPDSATLVSDIDITFLKKDAPYVVGDTVQEGVL    |
| SARS-CoV   | 455  | TCVVIPSKKAGGTTEMLSALEKVPVDEYITTPGQGCAGYTLEEAKTALKKCKSAFYVL      |
| SARS-CoV-2 | 479  | TAVVIPKKKAGGTTEMLAKALEKVPEDNYITTPGQGLNGYTVEEAKTVLKKCKSAFYIL     |
| SARS-CoV   | 515  | PSEAPNAKEEILGTVSWNLREMLAHAEETRKLMPICMDVRAIMATIQRKYKGIKIQEGIV    |
| SARS-CoV-2 | 539  | PSIISNEKQEEILGTVSWNLREMLAHAEETRKLMPVCVETKAIMSTIQRKYKGIKIQEGVV   |
| SARS-CoV   | 575  | DYGVREFFYTSKEPVASITTKLNSLNEPIVMTPIGYVTHGFENLEEAARCMRSLKAPAVVS   |
| SARS-CoV-2 | 599  | DYGAREFYTSKTTVASIINTLNDLNETLVMTPIGYVTHGLNLEEAARYMRSLKVPATVS     |
| SARS-CoV   | 635  | VSSPDAVTYNGYLTSSSKTSEEHFVETVSLAGSYKDWSSYSGQRTGLGHEFLKRGDKIVY    |
| SARS-CoV-2 | 659  | VSSPDAVTAYNGYLTSSSKTPEEHFTETVSLAGSYKDWSSYSGQSTGLGHEFLKRGDKSVY   |
| SARS-CoV   | 695  | HTLESPVEFHLDGEVLSLDKLSLLSLREVETIKVFTTVDNINLHTQIVDMSMTYGQQFG     |
| SARS-CoV-2 | 719  | YTSN-PTTFHLDGEVITFDNLKLLSLREVETIKVFTTVDNINLHTQIVDMSMTYGQQFG     |
| SARS-CoV   | 755  | PTYLDGADVTKIKPHVNEHGKTFEVLPSDDTLRSEAFEYYHTLDESFLGRYMSALNHTKK    |
| SARS-CoV-2 | 778  | PTYLDGADVTKIKPHNSHEGKTFEVLPNDDTLRVEAFEYYHTTDPSEFLGRYMSALNHTKK   |
| SARS-CoV   | 815  | WKEPQVGGLTSLKWADNNCYLSSVLLALQQLLEKFNPPALQDAYYRARAGAAANFCALIL    |
| SARS-CoV-2 | 838  | WKMPQVNGLTSLKWADNNCYLATAALLTLQQLLEKFNPPALQDAYYRARAGAAANFCALIL   |
| SARS-CoV   | 875  | AYSNTKTVGELGDVRETMTIHLLOHANLSSAKRVLNVVCKHCGQKTTTLTGVEAVMYMGTLIS |
| SARS-CoV-2 | 898  | AYCNKTVGELGDVRETMSYLFQHANLSSCKRVLNVVCKTCGQQQTTLKGVEAVMYMGTLIS   |
| SARS-CoV   | 935  | YDNLKTCVSIQCVCGRDATQYLVQQESSFVMSAPPAEYKLLQQTFLCANEYTGNYQCGH     |
| SARS-CoV-2 | 958  | YEQFKKGVOIPCTCGKQATKYLVQQESSFVMSAPPAQYELKHGTFTCASEYTGNYQCGH     |
| SARS-CoV   | 995  | YTHITAKETLYRIDGAHLTKMSEYKGPVTDVFYKETSYTTTIKPVSYKLDGVITYTEIEPK   |
| SARS-CoV-2 | 1018 | YKHTISKETLYCIDGALLTKSSEYKGPVTDVFYKENSYTTTIKPVYKLDGVVCTEIDPK     |
| SARS-CoV   | 1055 | LDGYKKDNAYYTEQPIDLVPTQPIPNASFDNFKLTCSTNKFADDLNQMTGETKPASREL     |
| SARS-CoV-2 | 1078 | LDNYKKDNSYYTEQPIDLVENQPYPNASFDNFKFVCDNFKFADDLNQMTGYKKPASREL     |
| SARS-CoV   | 1115 | SVTFFPDNLNGDVVAIDYRHYSSAFKKGAKLLHKPIVWHINQATTKTTEKPNTWCIRCLWS   |
| SARS-CoV-2 | 1138 | KVTFFPDNLNGDVVAIDYRHYTPSEKKGAKLLHKPIVWHINNATNKATKPNTWCIRCLWS    |

|            |      |                               |                                          |
|------------|------|-------------------------------|------------------------------------------|
| SARS-CoV   | 1175 | TKPVDTSNSFEVLAVEDTQGMNDLACE   | SQQPTSEEVENPTIQKEVLECDVKTTEVVGNV         |
| SARS-CoV-2 | 1198 | TKPVEITSNSFDVLKSEDAQGMNDLACE  | DLKEVSEEVENPTIQKDVLECNVKTTEVVGDI         |
| SARS-CoV   | 1235 | ILKPSDEGVKVTQELGHEDLMAAYVENTS | TIKKPNELSLAIGLKTATHGIAAINSVPW            |
| SARS-CoV-2 | 1258 | ILKPAANNSIKITEEVGHTDLMAAYVNS  | STIKKPNELSRVIGLKTATHGIAAINSVPW           |
| SARS-CoV   | 1295 | SKLLAYVVKPFLGQAAITTSNCAKRLA   | QRFVNNYPYVFTLLFQLCTFTKSTNSRIEASLP        |
| SARS-CoV-2 | 1318 | DTIANYAKPFLNKVVSTTINIVTRCL    | NRVCTNYMPYFETLLQLCTFTKSTNSRIKASMP        |
| SARS-CoV   | 1355 | TTIAKNVKSVAKLCLDAGINVKSPKFSK  | LEFTIANWLLLLSLCLGSLICVTAAGVLLS           |
| SARS-CoV-2 | 1378 | TTIAKNIVKSVCKFCLEASFNLIKSPNFS | KLINIIWFLLLSVCLGSLIYSTAALGVLS            |
| SARS-CoV   | 1415 | NFCAPSYCNCVRELYLNSNVTMDCEG    | SFPCTCLSGLDSDSYPALETIQVTISSMK            |
| SARS-CoV-2 | 1438 | NLCMPSYCTGYREGYLNSNVTIATVCT   | GSIPCSVCLSGLDSDIYPSLETIQVTISSEK          |
| SARS-CoV   | 1475 | LDLTILGLAAEWFLAYLLETFEFLYL    | LGLSAIMQMFEGYFASHFISNSWLMWFIISIVQMA      |
| SARS-CoV-2 | 1498 | WDLTAEGLVAEWFLAYLLETFEFLYL    | GLAAIMQMFESYFAWHFISNSWLMWLIINIVQMA       |
| SARS-CoV   | 1535 | PVSAMVRMYIFFASFYYIWKSYVHIMD   | GCTSSSTCMCYKRNRA TRVECTTIVNGMKRSFY       |
| SARS-CoV-2 | 1558 | PIVSAMVRMYIFFASFYYIWKSYVHV    | DGCNSSTCMCYKRNRA TRVECTTIVNGVRRSFY       |
| SARS-CoV   | 1595 | VYANGGKGFKTHNWNCLNCDTFCTG     | STFISDEVARDLSLQFKRPINPTDQSSYIVDSVA       |
| SARS-CoV-2 | 1618 | VYANGGKGFKLHNWNCNCDTFCA       | GSTFISDEVARDLSLQFKRPINPTDQSSYIVDSVT      |
| SARS-CoV   | 1655 | VKNGAHLHYFDKAGQKTYERHPL       | LSHFVNLDNLRANNTKGS LPINVIVFDGKSKCEDESASK |
| SARS-CoV-2 | 1678 | VKNGSHLHYFDKAGQKTYERHSL       | LSHFVNLDNLRANNTKGS LPINVIVFDGKSKCEDSSAK  |
| SARS-CoV   | 1715 | SASVYYSQLMCQPILLLDQALVSDV     | GDSTEVSVKMFDAYVDTFSATFSVPMEKLKALVAT      |
| SARS-CoV-2 | 1738 | SASVYYSQLMCQPILLLDQALVSDV     | GDSEVAVKMFDAYVNTFSSTFNVPMEKLKTLVAT       |
| SARS-CoV   | 1775 | AHSELAKGVALDGVLTSTFSAARQ      | GVVDVDTKDVTECLKLSHSDIEVTGDSCNNFML        |
| SARS-CoV-2 | 1798 | AEAEELAKNVSLDNVLTSTFSAARQ     | GFVDSVDTKDVTECLKLSHQSDIEVTGDSCNNVML      |
| SARS-CoV   | 1835 | TYNKVENMTPRDLGACIDCNARH       | INAQVAKSHNVS LIWNVKDMMSLSEQLRKQIRSAACK   |
| SARS-CoV-2 | 1858 | TYNKVENMTPRDLGACIDCSARH       | INAQVAKSHNIALI WNVKDMMSLSEQLRKQIRSAACK   |
| SARS-CoV   | 1895 | NNLPFRLTCATTRQVVNVTTTKI       | SLKGG                                    |
| SARS-CoV-2 | 1918 | NNLPFKLTCATTRQVVNVTTKIAL      | KGG                                      |

Total sites= 1948 aa

Conserved sites= 1477 aa (75.8%)

Variable sites= 442 aa

Deleted sites= 29 aa

**Supplemental Figure 2: Protein Alignment of PLPro Protease from SARS-CoV and SARS-CoV-2.** Alignment was performed using MEGA-X and aligned using ClustalW with the default settings. Conserved sites are highlighted in black; substitutions of biochemically similar amino acids are highlighted in grey. Alignment is with accession's SARS-CoV: NP\_828862.2 and SARS-CoV-2: YP\_009725299.1.
